# Supplementary material for: Urine Sediment Examination: Comparison Between Laboratory-Performed Versus Nephrologist-Performed Microscopy and Accuracy in Predicting Pathologic Diagnosis in Patients with Acute Kidney Injury
Source: PubMed Central journal article supplement — Kidney360. 2023 Feb 21;4(7):918–23. doi: 10.34067/KID.0000000000000081 (PMC10371296; doi:10.34067/kid.0000000000000081), 2023-02-21
Supplement: kidney360-4-0918-s001.pdf [file kidney360-4-0918-s001.pdf]

**Appendix Table 1. Sensitivity Analysis: Finding per laboratory analysis vs. nephrologist analysis for samples drawn within 24h**

| <b>Laboratory UrSA</b>                                                 | <b>Nephrologist UrSA</b>     |                               |              |
|------------------------------------------------------------------------|------------------------------|-------------------------------|--------------|
|                                                                        | <i>WBC Absent</i>            | <i>WBC Present</i>            | <i>Total</i> |
| <i>WBC Absent</i>                                                      | 170                          | 14                            | 184          |
| <i>WBC Present</i>                                                     | 64                           | 50                            | 114          |
| <i>Total</i>                                                           | 234                          | 64                            | 298          |
| <i>Kappa 0.40 (95%CI:0.29, 0.50)</i>                                   |                              |                               |              |
|                                                                        |                              |                               |              |
| <b>Laboratory UrSA</b>                                                 | <b>Nephrologist UrSA</b>     |                               |              |
|                                                                        | <i>RBC Absent</i>            | <i>RBC Present</i>            | <i>Total</i> |
| <i>RBC Absent</i>                                                      | 152                          | 20                            | 172          |
| <i>RBC Present</i>                                                     | 54                           | 72                            | 126          |
| <i>Total</i>                                                           | 206                          | 92                            | 298          |
| <i>Kappa 0.47 (95%CI: 0.37, 0.57)</i>                                  |                              |                               |              |
|                                                                        |                              |                               |              |
| <b>Laboratory UrSA</b>                                                 | <b>Nephrologist UrSA</b>     |                               |              |
|                                                                        | <i>Dysmorphic RBC Absent</i> | <i>Dysmorphic RBC Present</i> | <i>Total</i> |
| <i>Dysmorphic RBC Absent</i>                                           | 282                          | 16                            | 298          |
| <i>Dysmorphic RBC Present</i>                                          | 0                            | 0                             | 0            |
| <i>Total</i>                                                           | 282                          | 16                            | 298          |
| <i>Kappa not reported because laboratory UrSA always showed absent</i> |                              |                               |              |

**Appendix Table 2. Sensitivity Analysis: Type of Casts found per laboratory analysis vs. nephrologist analysis for samples drawn within 24h**

| <i>Laboratory UrSA</i>                | <i>Nephrologist UrSA</i> |                      |                  |            |            |              |
|---------------------------------------|--------------------------|----------------------|------------------|------------|------------|--------------|
|                                       | <i>None</i>              | <i>Hyaline or FG</i> | <i>CG or MBC</i> | <i>WBC</i> | <i>RBC</i> | <i>Total</i> |
| <i>None</i>                           | 59                       | 42                   | 49               | 5          | 3          | 158          |
| <i>Hyaline or FG</i>                  | 39                       | 42                   | 47               | 1          | 9          | 138          |
| <i>CG or MBC</i>                      | 0                        | 0                    | 0                | 0          | 0          | 0            |
| <i>WBC</i>                            | 0                        | 0                    | 0                | 0          | 0          | 0            |
| <i>RBC</i>                            | 1                        | 0                    | 0                | 1          | 0          | 2            |
| <i>total</i>                          | 99                       | 84                   | 96               | 7          | 12         | 298          |
| <i>Kappa 0.05 (95%CI:-0.02, 0.11)</i> |                          |                      |                  |            |            |              |
